# Supplementary material for: RNA markers enable phenotypic test of antibiotic susceptibility in Neisseria gonorrhoeae after 10 minutes of ciprofloxacin exposure
Source: PubMed Central journal article supplement (PMC6072703; doi:10.1038/s41598-018-29707-w), 2018-08-02
Supplement: 41598_2018_29707_MOESM1_ESM.pdf [file 41598_2018_29707_MOESM1_ESM.pdf]

## RNA markers enable phenotypic test of antibiotic susceptibility in *Neisseria gonorrhoeae* after 10 minutes of ciprofloxacin exposure

Tahmineh Khazaei<sup>1</sup>, Jacob T. Barlow<sup>1</sup>, Nathan G. Schoepp<sup>2</sup>, and Rustem F. Ismagilov<sup>\*1,2</sup>

<sup>1</sup>Division of Biology and Biological Engineering, California Institute of Technology

<sup>2</sup>Division of Chemistry and Chemical Engineering, California Institute of Technology

1200 E. California Blvd., Pasadena, CA, United States of America

\*Correspondence to: [rustem.admin@caltech.edu](mailto:rustem.admin@caltech.edu)

**Supplementary Table S1.** List of candidate markers and their expression in transcripts per million (TPM) and copies per cell for susceptible isolate S2 and resistant isolate R2 after 15 min of ciprofloxacin exposure. The genome used for alignment was *N. gonorrhoeae* FA1090 (NCBI Reference Sequence: NC\_002946.2).

| Locus Tag | Gene Description                                               | Susceptible (S2) Control |             | Susceptible (S2) Treated |             | Resistant (R2) Control |             | Resistant (R2) Treated |             |
|-----------|----------------------------------------------------------------|--------------------------|-------------|--------------------------|-------------|------------------------|-------------|------------------------|-------------|
|           |                                                                | TPM                      | copies/cell | TPM                      | copies/cell | TPM                    | copies/cell | TPM                    | copies/cell |
| NGO0340   | cysteine synthase A ( <i>cysK</i> )                            | 894.1                    | 21.1        | 505.2                    | 8.9         | 551.8                  | 16.3        | 600.0                  | 20.0        |
| NGO1837   | 50S ribosomal protein L4 ( <i>rplD</i> )                       | 474.9                    | 10.8        | 262.2                    | 4.4         | 403.6                  | 11.9        | 425.4                  | 13.8        |
| NGO1843   | elongation factor G ( <i>fusA</i> )                            | 433.4                    | 9.8         | 224.9                    | 3.8         | 432.9                  | 12.8        | 503.5                  | 16.6        |
| NGO2024   | 50S ribosomal protein L13 ( <i>rplM</i> )                      | 415.0                    | 9.4         | 213.5                    | 3.6         | 455.3                  | 13.5        | 503.5                  | 16.6        |
| NGO1845   | 30S ribosomal protein S12 ( <i>rpsL</i> )                      | 563.1                    | 13.0        | 286.8                    | 4.9         | 615.4                  | 18.2        | 697.6                  | 23.5        |
| NGO1677   | 50S ribosomal protein L27 ( <i>rpmA</i> )                      | 410.7                    | 9.3         | 192.2                    | 3.2         | 500.6                  | 14.8        | 497.6                  | 16.4        |
| NGO1844   | 30S ribosomal protein S7                                       | 520.0                    | 11.9        | 241.3                    | 4.0         | 520.1                  | 15.4        | 651.6                  | 21.9        |
| NGO0171   | 50S ribosomal protein L19 ( <i>rplS</i> )                      | 379.2                    | 8.5         | 175.0                    | 2.9         | 328.5                  | 9.7         | 353.2                  | 11.3        |
| NGO1834   | 30S ribosomal protein S19 ( <i>rpsS</i> )                      | 330.0                    | 7.4         | 152.1                    | 2.5         | 260.9                  | 7.7         | 292.7                  | 9.2         |
| NGO0172   | tRNA (guanine-N(1)-methyltransferase ( <i>trmD</i> ))          | 237.3                    | 5.2         | 108.8                    | 1.7         | 208.8                  | 6.2         | 224.6                  | 6.9         |
| NGO1835   | 50S ribosomal protein L2 ( <i>rplB</i> )                       | 392.5                    | 8.9         | 179.1                    | 2.9         | 297.6                  | 8.8         | 359.8                  | 11.5        |
| NGO1673   | type IV pilus assembly protein ( <i>pilB</i> )                 | 225.9                    | 4.9         | 101.5                    | 1.6         | 199.3                  | 5.9         | 214.9                  | 6.6         |
| NGO1833   | 50S ribosomal protein L22 ( <i>rplV</i> )                      | 343.8                    | 7.7         | 147.9                    | 2.4         | 292.1                  | 8.6         | 304.3                  | 9.6         |
| NGO2173   | 50S ribosomal protein L32 ( <i>rpmF</i> )                      | 407.5                    | 9.2         | 173.6                    | 2.9         | 394.7                  | 11.7        | 404.1                  | 13.1        |
| NGO0604   | 30S ribosomal protein S1 ( <i>rpsA</i> )                       | 437.9                    | 9.9         | 185.3                    | 3.1         | 456.3                  | 13.5        | 493.9                  | 16.2        |
| NGO0016   | preprotein translocase subunit ( <i>secG</i> )                 | 180.1                    | 3.9         | 73.7                     | 1.1         | 169.1                  | 5.0         | 184.5                  | 5.6         |
| NGO2174   | hypothetical protein                                           | 372.8                    | 8.4         | 150.2                    | 2.4         | 368.3                  | 10.9        | 361.6                  | 11.6        |
| NGO2164   | GMP synthase ( <i>guaA</i> )                                   | 118.3                    | 2.5         | 45.0                     | 0.7         | 98.6                   | 2.9         | 109.4                  | 3.2         |
| NGO1676   | 50S ribosomal protein L21 ( <i>rplU</i> )                      | 554.6                    | 12.8        | 200.4                    | 3.3         | 555.2                  | 16.4        | 587.7                  | 19.6        |
| NGO1679   | 50S ribosomal protein L33 ( <i>rpmG</i> )                      | 283.8                    | 6.3         | 101.4                    | 1.6         | 298.5                  | 8.8         | 284.3                  | 8.9         |
| NGO1658   | hypothetical protein                                           | 98.4                     | 2.1         | 33.8                     | 0.5         | 118.3                  | 3.5         | 116.1                  | 3.4         |
| NGO1440   | macrolide transport protein MacA                               | 143.3                    | 3.1         | 48.6                     | 0.7         | 132.3                  | 3.9         | 139.7                  | 4.2         |
| NGO0174   | 30S ribosomal protein S16 ( <i>rpsP</i> )                      | 315.2                    | 7.0         | 101.2                    | 1.6         | 295.8                  | 8.7         | 340.5                  | 10.9        |
| NGO0173   | ribosome maturation factor RimM ( <i>rimM</i> )                | 359.8                    | 8.1         | 113.5                    | 1.8         | 316.8                  | 9.4         | 318.8                  | 10.1        |
| NGO0592   | trigger factor ( <i>tig</i> )                                  | 146.5                    | 3.1         | 45.5                     | 0.7         | 147.5                  | 4.3         | 152.1                  | 4.6         |
| NGO1680   | 50S ribosomal protein L28 ( <i>rpmB</i> )                      | 452.8                    | 10.3        | 130.3                    | 2.1         | 470.2                  | 13.9        | 525.4                  | 17.3        |
| NGO0620   | aspartate alpha-decarboxylase                                  | 64.8                     | 1.3         | 18.6                     | 0.3         | 54.2                   | 1.6         | 59.3                   | 1.7         |
| NGO1659   | intracellular septation protein A                              | 62.2                     | 1.3         | 17.8                     | 0.3         | 63.6                   | 1.9         | 70.7                   | 2.0         |
| NGO1291   | transcriptional regulator ( <i>yebC</i> )                      | 64.1                     | 1.3         | 18.0                     | 0.3         | 79.9                   | 2.3         | 77.9                   | 2.2         |
| NGO0648   | membrane protein                                               | 56.4                     | 1.1         | 15.3                     | 0.2         | 47.6                   | 1.4         | 45.2                   | 1.2         |
| NGO0593   | ATP-dependent Clp protease proteolytic subunit ( <i>clpP</i> ) | 60.2                     | 1.2         | 16.0                     | 0.2         | 73.6                   | 2.2         | 75.9                   | 2.2         |
| NGO1804   | (3R)-hydroxymyristoyl-ACP dehydratase ( <i>fabZ</i> )          | 91.0                     | 1.9         | 24.0                     | 0.3         | 74.6                   | 2.2         | 73.5                   | 2.1         |
| NGO0618   | membrane protein                                               | 81.4                     | 1.7         | 20.1                     | 0.3         | 66.8                   | 2.0         | 70.2                   | 2.0         |

|         |                                                              |        |      |       |     |        |      |        |      |
|---------|--------------------------------------------------------------|--------|------|-------|-----|--------|------|--------|------|
| NGO0619 | 2-dehydro-3-deoxyphosphooctonate aldolase                    | 61.1   | 1.2  | 15.1  | 0.2 | 51.1   | 1.5  | 62.6   | 1.8  |
| NGO1812 | major outer membrane protein ( <i>porB</i> )                 | 1293.2 | 31.2 | 293.4 | 5.0 | 1459.1 | 43.3 | 1587.1 | 57.1 |
| NGO1890 | glutamate permease; sodium/glutamate symport carrier protein | 35.0   | 0.7  | 7.5   | 0.1 | 40.3   | 1.2  | 48.9   | 1.3  |
| NGO2098 | diaminopimelate decarboxylase                                | 26.0   | 0.5  | 4.9   | 0.1 | 18.6   | 0.5  | 18.6   | 0.5  |
| NGO2100 | frataxin-like protein ( <i>cyaY</i> )                        | 20.4   | 0.4  | 3.6   | 0.0 | 14.0   | 0.4  | 18.1   | 0.5  |

**Supplementary Table S2.** Primer sequences used for validation of candidate markers by digital PCR.

| Candidate Marker | Gene Name                                  | Forward Primer Sequence | Reverse Primer Sequence |
|------------------|--------------------------------------------|-------------------------|-------------------------|
| porB             | major outer membrane porin                 | GCTACGATTCTCCGAATTTGCC  | CCGCCKACCAAACGGTGAAC    |
| rpmB             | 50S ribosomal protein L28                  | TTGCCCAACTTGCAATCACG    | AGCACGCAAATCAGCCAATAC   |
| tig              | trigger factor                             | AAAGCCTTGGGTATTGCGG     | TGACCAAAGCAACCGGAAC     |
| yebC             | YebC/PmpR family Transcriptional Regulator | GCTTTGGAAAAAGCAGCCG     | GGTTTTGTTGTCGGTCAGGC    |
| pilB             | Type IV-A pilus assembly ATPase            | GACTTTTGCCGCTGCTTTG     | GCGCATTATTCGTGTGCAG     |
| cysK             | Cysteine synthase A                        | GAGGCTTCCCCGTATTGAG     | TTCAAAGCCGCTTCGTTCCG    |
| 16S rRNA         | 16S ribosomal RNA                          | ACTGCGTTCTGAACTGGGTG    | GGCGGTCAATTCACGCG       |

**Supplementary Table S3.** Minimum inhibitory concentration (MIC) values for the 49 *Neisseria gonorrhoeae* clinical isolates acquired from the CDC and FDA Antibiotic Resistance Isolate Bank<sup>1</sup>.

| MIC   | Number of strains | Susceptible or Resistant |
|-------|-------------------|--------------------------|
| 0.015 | 8                 | Susceptible              |
| 0.03  | 1                 | Susceptible              |
| 4     | 1                 | Resistant                |
| 8     | 6                 | Resistant                |
| 16    | 33                | Resistant                |

<sup>1</sup> CDC and FDA Antibiotic Resistance Isolate Bank. Atlanta (GA): CDC. (2018)
